# Supplementary material for: Dioxetane formation and chemiluminescent emission upon the combination of a vinylphenol derivative with naphthalene endoperoxide
Source: Royal Society of Chemistry journal article supplement (doi:10.1039/c6ra28079j), 2017-01-01
Supplement: c6ra28079j1.pdf [file c6ra28079j1.pdf]

## Supplementary Information

Dioxetane formation and chemiluminescent emission upon the combination of a vinylphenol derivative with naphthalene endoperoxide

Yui Umehara,<sup>1</sup> Aoi Son,<sup>1</sup> Teruyuki Kondo<sup>1,\*</sup> and Kazuhito Tanabe<sup>2,\*</sup>

<sup>1</sup>Department of Energy and Hydrocarbon Chemistry, Graduate School of Engineering, Kyoto University, Katsura Campus, Kyoto 615-8510, Japan

<sup>2</sup>Department of Chemistry and Biological Science, College of Science and Engineering, Aoyama Gakuin University, 5-10-1 Fuchinobe, Chuo-ku, Sagamihara, 252-5258, Japan

\*corresponding author

Dr. Teruyuki Kondo

Phone: +81-75-383-7055 FAX: +81-75-383-2504

e-mail: [teruyuki@scl.kyoto-u.ac.jp](mailto:teruyuki@scl.kyoto-u.ac.jp)

Dr. Kazuhito Tanabe

Phone: +81-42-759-6229 FAX: +81-42-759-6493

e-mail: [tanabe.kazuhito@chem.aoyama.ac.jp](mailto:tanabe.kazuhito@chem.aoyama.ac.jp)

## Experimental Section

**General Methods.** Melting points were determined by Yanagimoto micro melting point apparatus and uncorrected. <sup>1</sup>H-NMR spectra were measured with JEOL JMN-AL-300 (300 MHz) or JOEL JNM-ECA600P (600 MHz) spectrophotometers. Coupling constants (*J* values) are reported in hertz. The chemical shifts are expressed in ppm downfield from tetramethylsilane ( $\delta = 0$ ) or residual chloroform ( $\delta = 7.24$ ) as an internal standard. <sup>13</sup>C NMR spectra were measured with JEOL JMN-AL-300 (75 MHz) or JOEL JNM-ECA600P (600 MHz) spectrophotometers. Mass spectra were recorded on a JOEL JMS-SX102A spectrometer, using nitrobenzylalcohol matrix. Wakogel C-300 was used for silica gel column chromatography. Precoated TLC plates Merck silica gel 60 F<sub>254</sub> was used for monitoring reactions. VPA was synthesized as described previously (Simsek Turan; Engin U. Akkaya, *Org. Lett.*, **2014**, *16*, 1680–1683). All aqueous solutions were prepared using purified water (YAMATO, WR600A).

**Compound 2.** 4-methyl-1-naphthalenepropionic acid (199 mg, 0.93 mmol), N- (tert-Butoxycarbonyl)-1, 2-diaminoethane (148  $\mu$ L, 0.93 mmol), 1- (3-

Dimethylaminopropyl)-3-ethylcarbodiimide (EDCI) (179 mg, 0.93 mmol), and 1-Hydroxybenzotriazole (HOBT) (128 mg, 0.93 mmol) were dissolved in 5 mL DMF, and stirred at room temperature for 22 h. After addition of saturated NaHCO<sub>3</sub>, reaction mixture was extracted with EtOAc. Combined organic layer was washed by brine, and dried with MgSO<sub>4</sub>. After removal of the solvent, the residue was purified by column chromatography (SiO<sub>2</sub>, CHCl<sub>3</sub>). Compound **2** was obtained as white solid (258 mg, 78%): m.p. 133 °C; <sup>1</sup>H NMR (600 MHz, CDCl<sub>3</sub>): δ 8.08–8.06 (m, 1H), 8.04–8.02 (m, 1H), 7.55–7.52 (m, 2H), 7.24 (s, 1H), 5.94 (brs, 1H), 4.66 (brs, 1H), 3.41 (t, *J* = 7.8 Hz, 2H), 3.29 (q, *J* = 5.4 Hz, 2H), 3.15 (d, *J* = 5.4 Hz, 2H), 2.67 (s, 3H), 2.59 (t, *J* = 7.8 Hz, 2H), 1.41 (s, 9H); <sup>13</sup>C NMR (150 MHz, CDCl<sub>3</sub>) δ 172.84, 156.75, 134.92, 133.14, 132.95, 131.57, 126.29, 125.93, 125.75, 125.47, 125.00, 124.05, 79.64, 40.65, 40.25, 37.88, 28.87, 28.34, 19.44;. FABMS (matrix; 3-nitrobenzyl alcohol) *m/z* 356 [M<sup>+</sup>]; HRMS calcd. for C<sub>21</sub>H<sub>28</sub>O<sub>3</sub>N<sub>2</sub><sup>+</sup>: [M<sup>+</sup>], 356.2100, found 356.2092.

**Compound 3.** Compound **2** (300 mg, 0.84 mmol) was dissolved in 0.5 M HCl in methanol solution (5 mL) and the mixture was stirred at room temperature for 4 h. After addition of saturated NaHCO<sub>3</sub>, the reaction mixture was extracted with EtOAc.

Combined organic layer was washed by brine, and dried with MgSO<sub>4</sub>. After removal of the solvent, the residue was purified by column chromatography (SiO<sub>2</sub>, 20% MeOH-CHCl<sub>3</sub>). Compound **3** was obtained as pale yellow oil (32 mg, 15%): <sup>1</sup>H NMR (300 MHz, DMSO-d<sub>6</sub>) δ 8.11–8.08 (m, 1H), 8.04-8.01 (m, 1H), 7.86 (brs, 1H), 7.58-7.55 (m, 2H), 7.28-7.22 (m, 2H), 3.25 (t, *J* = 7.3 Hz, 2H), 3.08 (q, *J* = 5.9 Hz, 2H), 2.61 (s, 3H), 2.58 (t, *J* = 6.6 Hz, 2H), 2.46 (t, *J* = 7.3 Hz, 2H); <sup>13</sup>C NMR (125 MHz, DMSO-*d*) δ 172.15, 135.39, 132.44, 132.29, 131.34, 126.26, 125.74, 125.54, 125.42, 124.80, 124.13, 38.52, 36.61, 36.43, 28.03, 19.05;. FABMS (matrix; 3-nitrobenzyl alcohol) *m/z* 257 [(M + H)<sup>+</sup>]; HRMS calcd. for C<sub>16</sub>H<sub>21</sub>ON<sub>2</sub><sup>+</sup>: 257.1654, found 257.1655.

#### **Preparation of silica nanoparticles bearing naphthalene units (MSN-NA).**

Mesoporous silica nanoparticle (20 mg, 0.8 μmol), compound **3** (15.9 mg, 62 μmol), EDCI (12 mg, 62 μmol) and HOBt (8.4 mg, 62 μmol) were dissolved in 1 mL DMF and the mixture was stirred for 12 h. The precipitate was produced by the addition of water (9 mL) and isolated by centrifuging at 3000 rpm for 3 min. Wash of the precipitate with water twice gave MSN-NA.

**Oxidation of MSN-NA (MSN-NEP).** MSN-NA (2.7 mg, 0.11 mmol) was dissolved in 50 mM methylene blue solution (5 mL) in the solvent (DMSO: H<sub>2</sub>O = 1: 1). After bubbling of oxygen gas (15 min), the mixture was photo-irradiated (665 nm) for 1 h. After irradiation, the precipitate was produced by the addition of water and isolated by centrifuging at 3000 rpm for 3 min. Wash of the precipitate with water twice gave MSN-NEP.

**Measurement of Absorption Spectra.** All UV-vis absorption spectra of the sample were recorded using a JASCO V-630 spectrophotometer with a 1 cm quartz cell.

**Measurement of chemiluminescent spectra.** Chemiluminescent spectra of the samples were recorded using a JASCO FP-8300 spectrofluorometer with a 1 cm quartz cell. The sample in aqueous solution containing phosphate buffer at various pH conditions were prepared and subjected to spectrometer.

**Measurement of emission of singlet oxygen.** Phosphorescence emission of singlet

oxygen from MSN-NEP and NEP were measured by means of spectrometer consisted of XeCl excimer laser (Lambda Physik Complex102, 308 nm, Pulse width 20 ns) equipped with photomultiplier tube (Hamamatsu Photonics H10330B-45). The samples in DMSO were prepared and subjected to spectrometer.

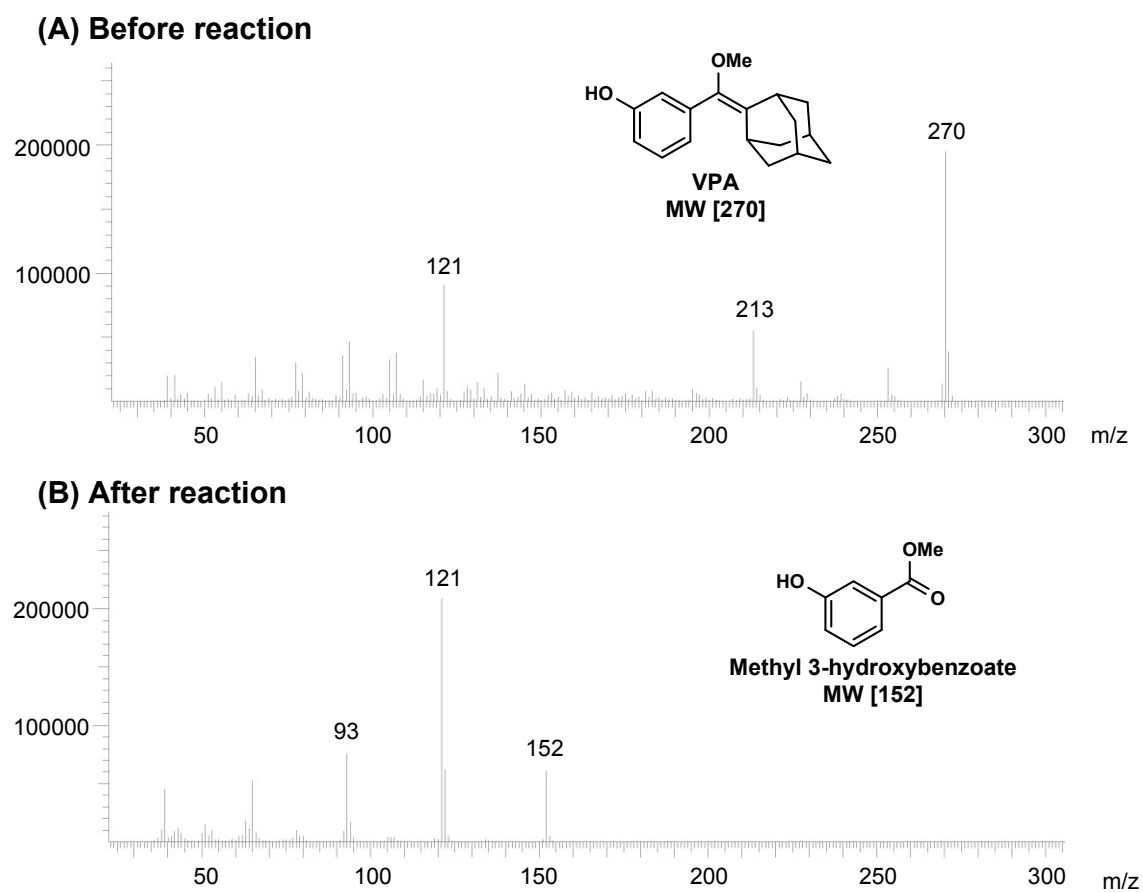

**Figure S1.** Analysis of the reaction of VPA (10 mM) and NEP (90 mM) by GC-MS.

MS spectra were measured before (A) or after the reaction for 1 h (B).

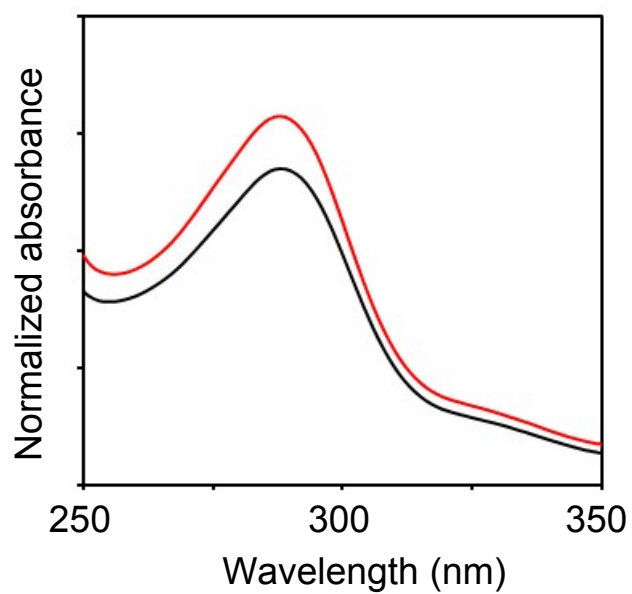

**Figure S2.** Absorption spectra of MSN-NEP before (black) or after release of  $^1\text{O}_2$  (red).



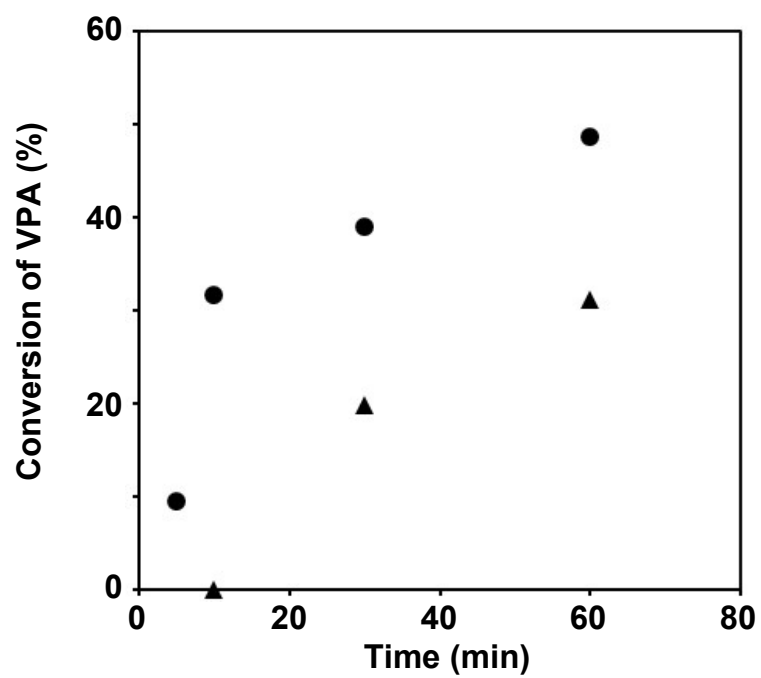

**Figure S3.** Time profile of VPA consumption during the reaction with NEP (circle) or MSN-NEP (triangle).
